# Supplementary material
Source: PubMed Central journal article supplement (PMC6779479)

Fig. 2c

Phospho-RYR2

250kD-  
150kD-  
100kD-

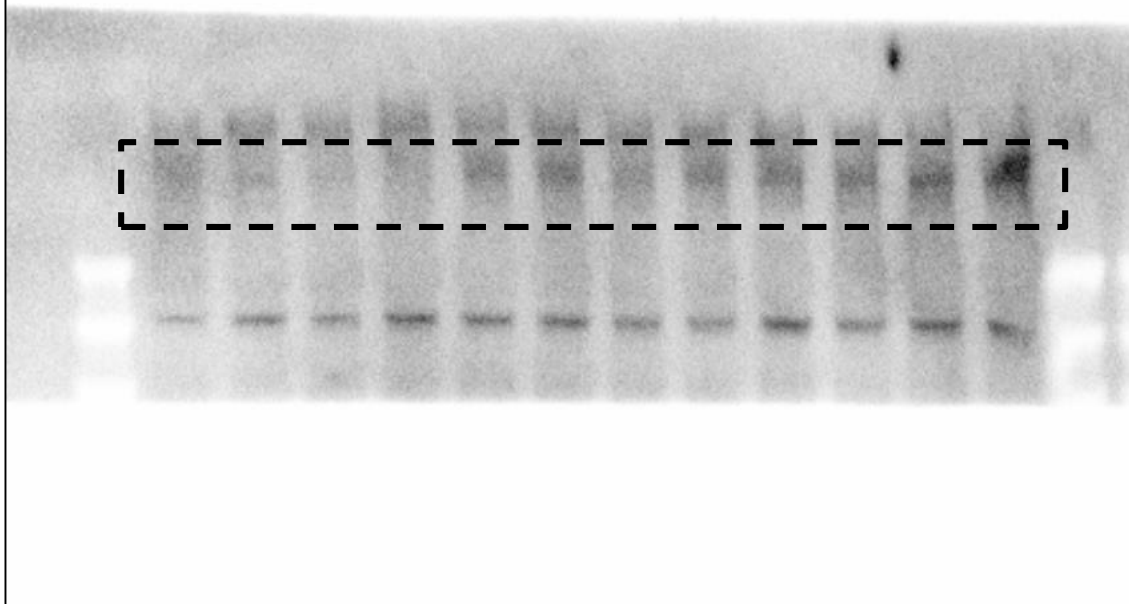

Fig. 2c

RYR2

250kD-  
150kD-  
100kD-

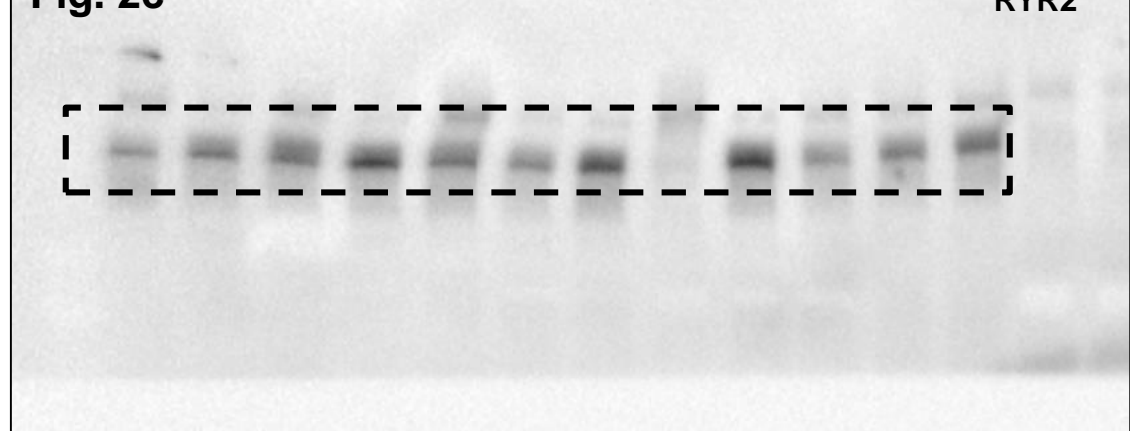

Fig. 2c

100kD-  
75kD-  
50kD-  
37kD-

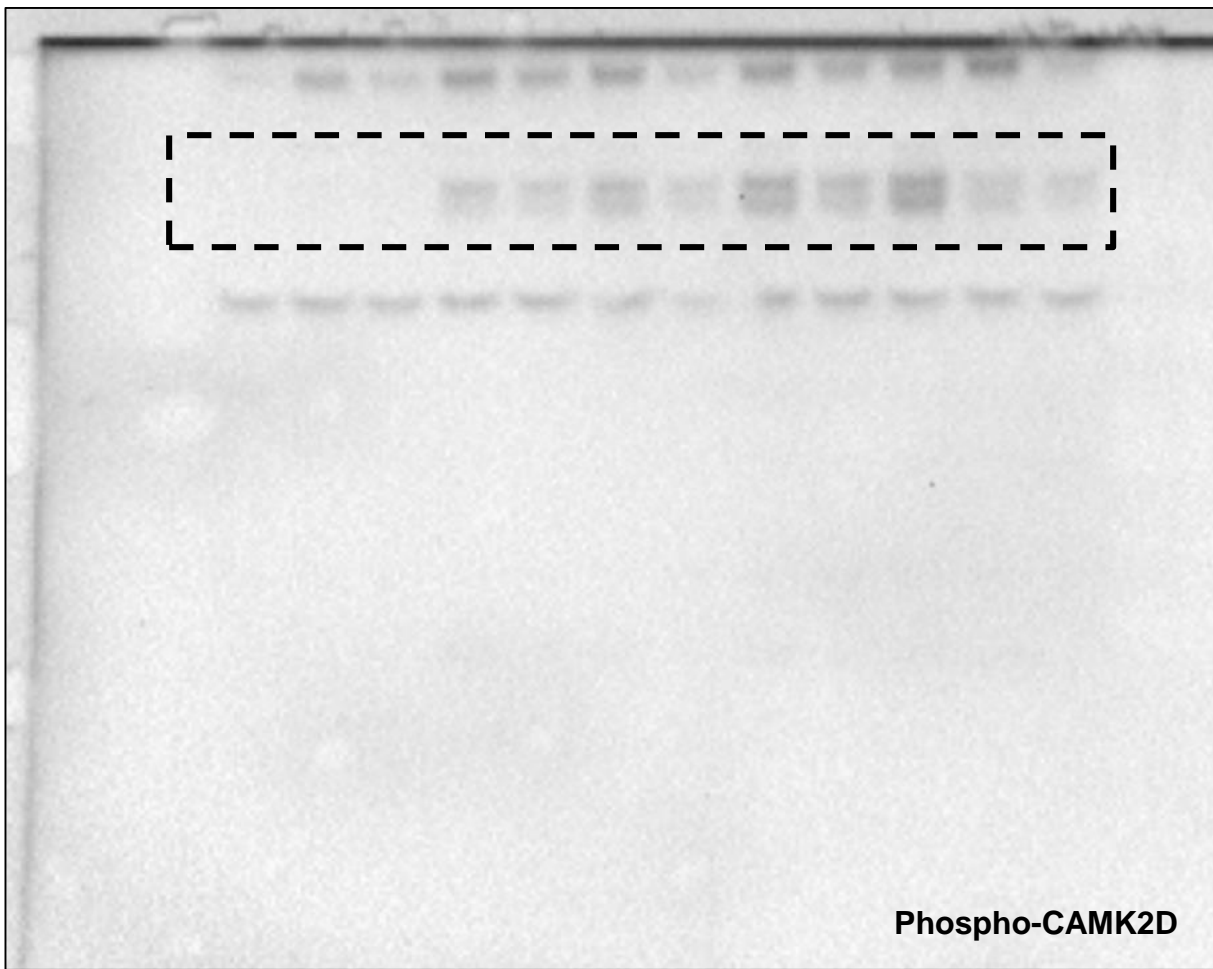

Phospho-CAMK2D

Fig. 2c

100kD-  
75kD-  
50kD-  
37kD-

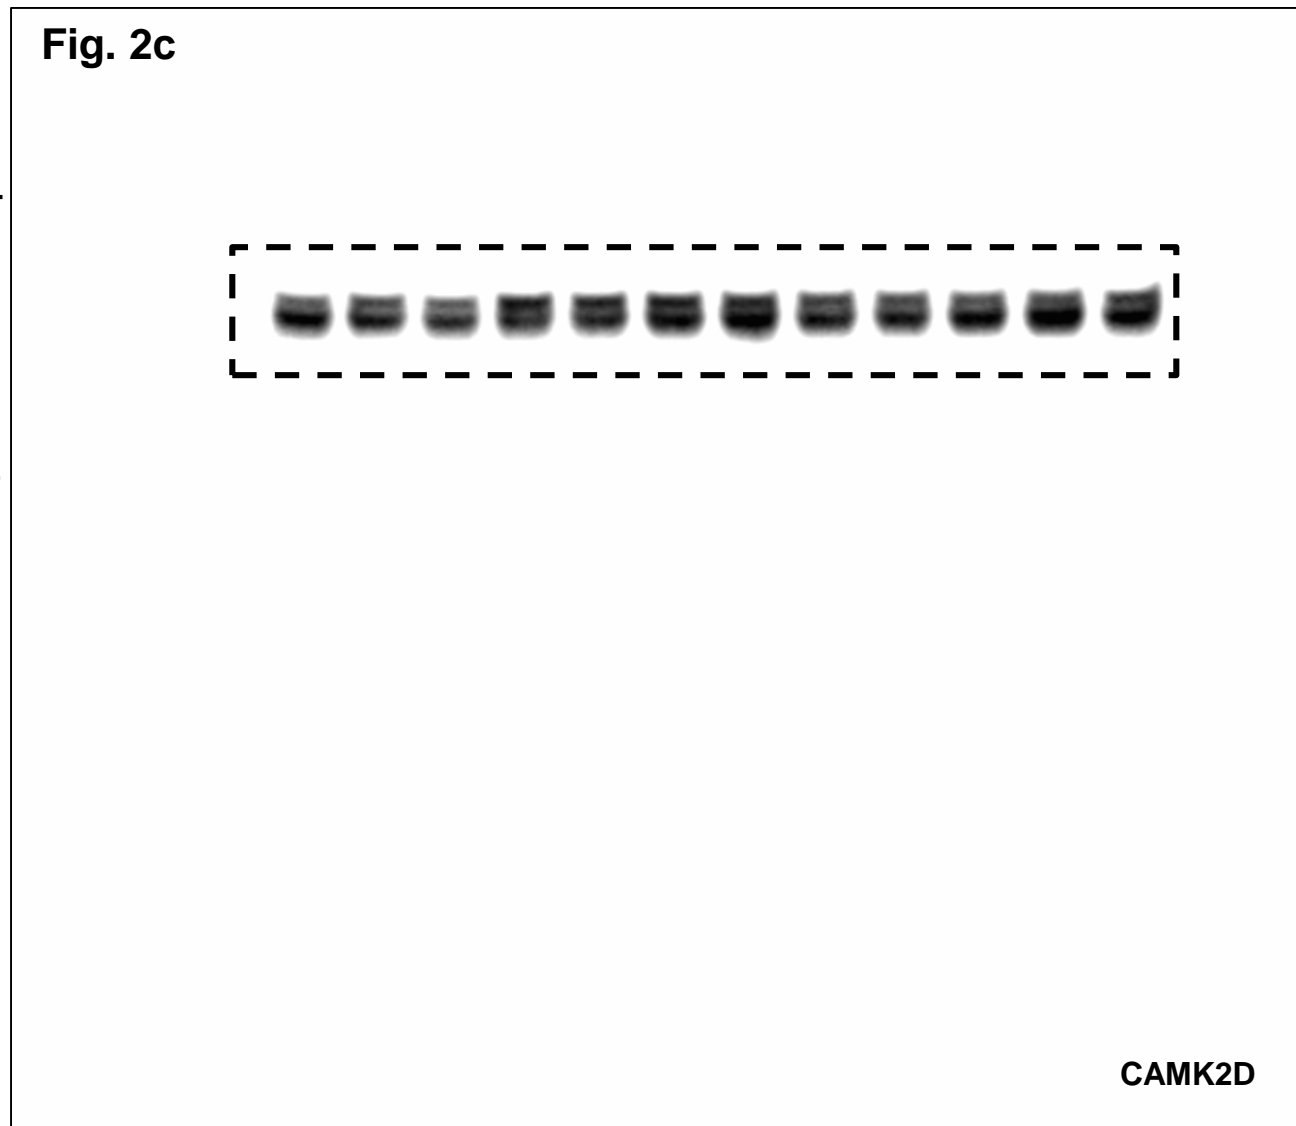

CAMK2D

Fig. 2c

GAPDH

75kD-  
50kD-  
37kD-

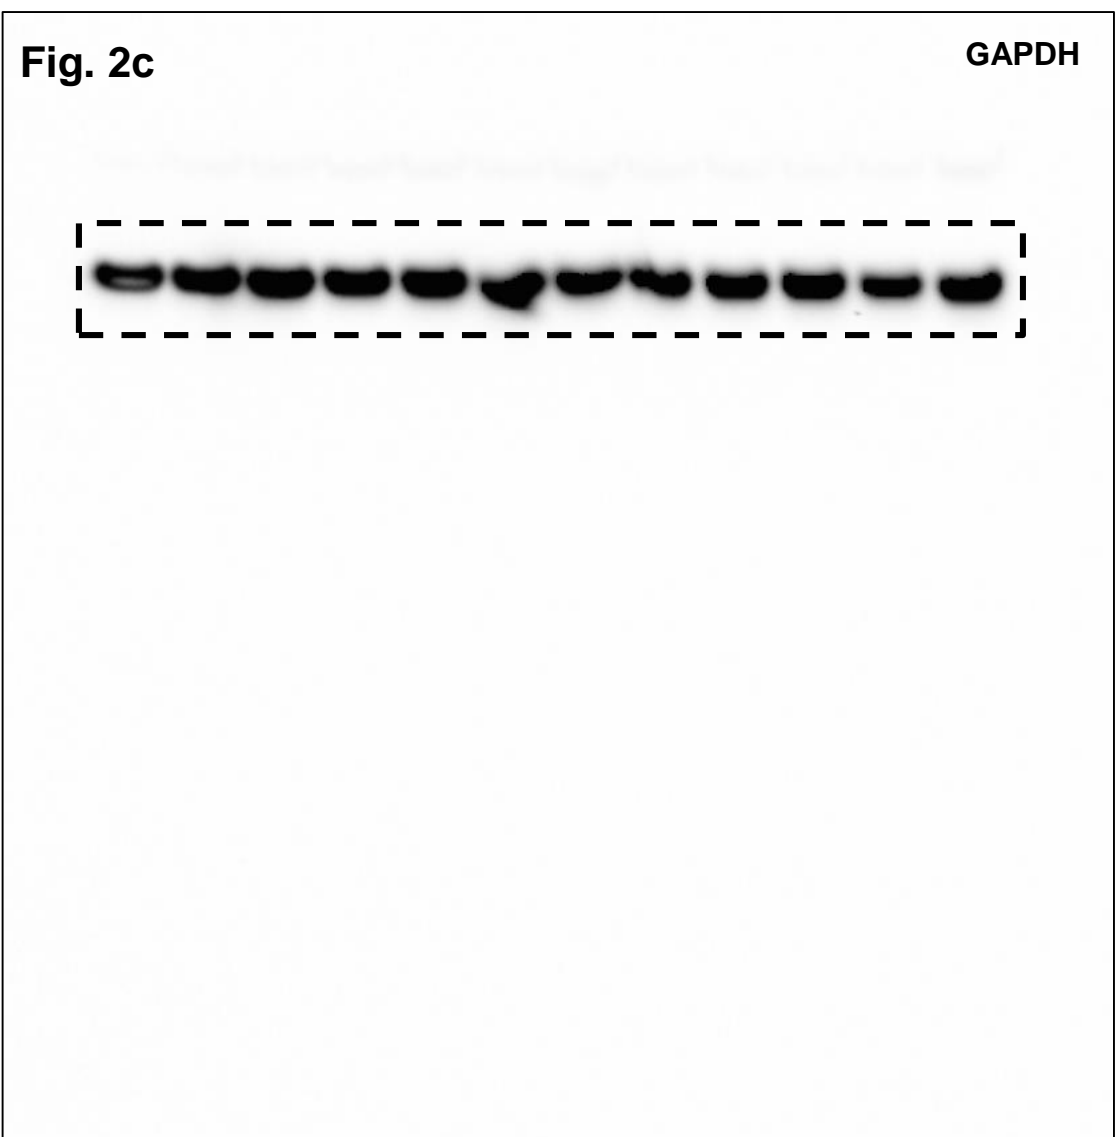

Extended Data Fig. 3j

Phospho-CAMK2D

100kD-  
75kD-  
50kD-  
37kD-

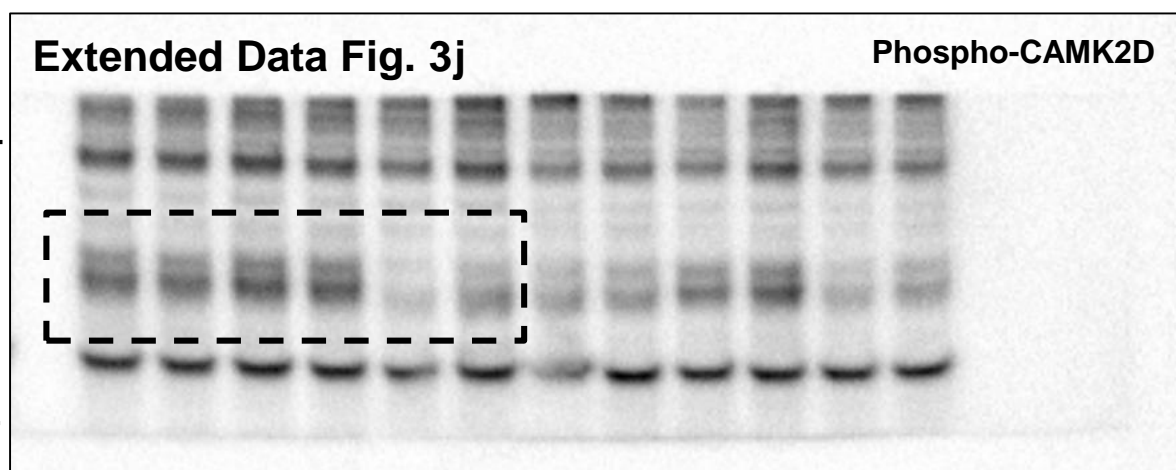

Extended Data Fig. 3j

CAMK2D

100kD-  
75kD-  
50kD-  
37kD-

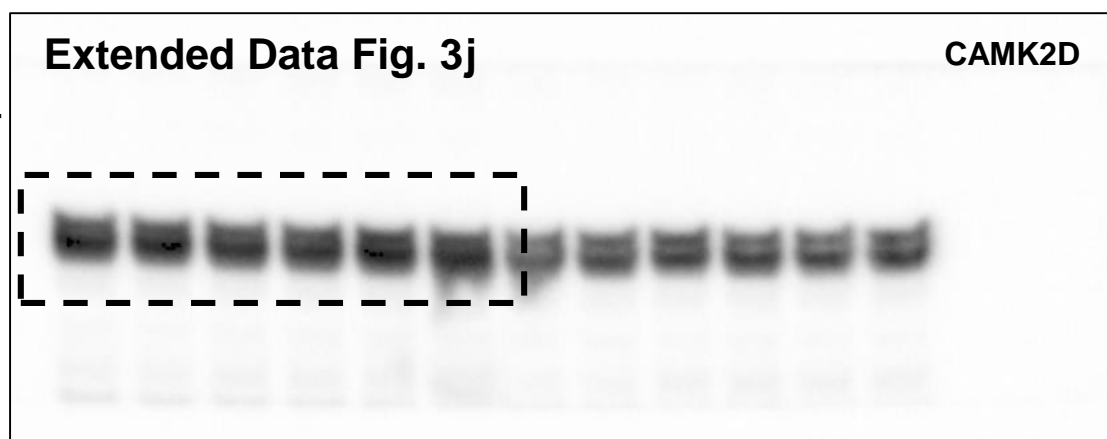

Extended Data Fig. 3j

Phospho-RYR2

250kD-  
150kD-  
100kD-

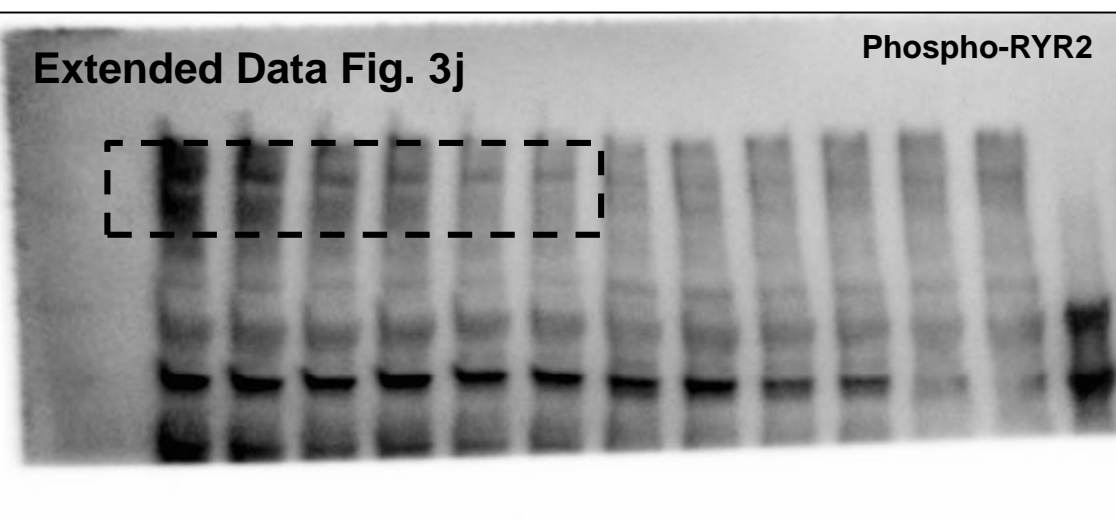

Extended Data Fig. 3j

RYR2

250kD-  
150kD-  
100kD-

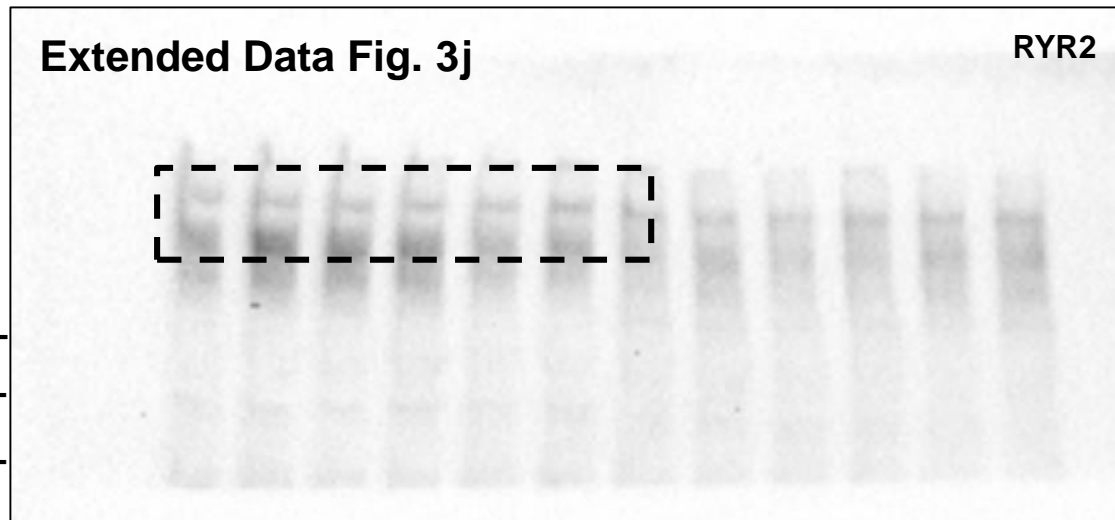

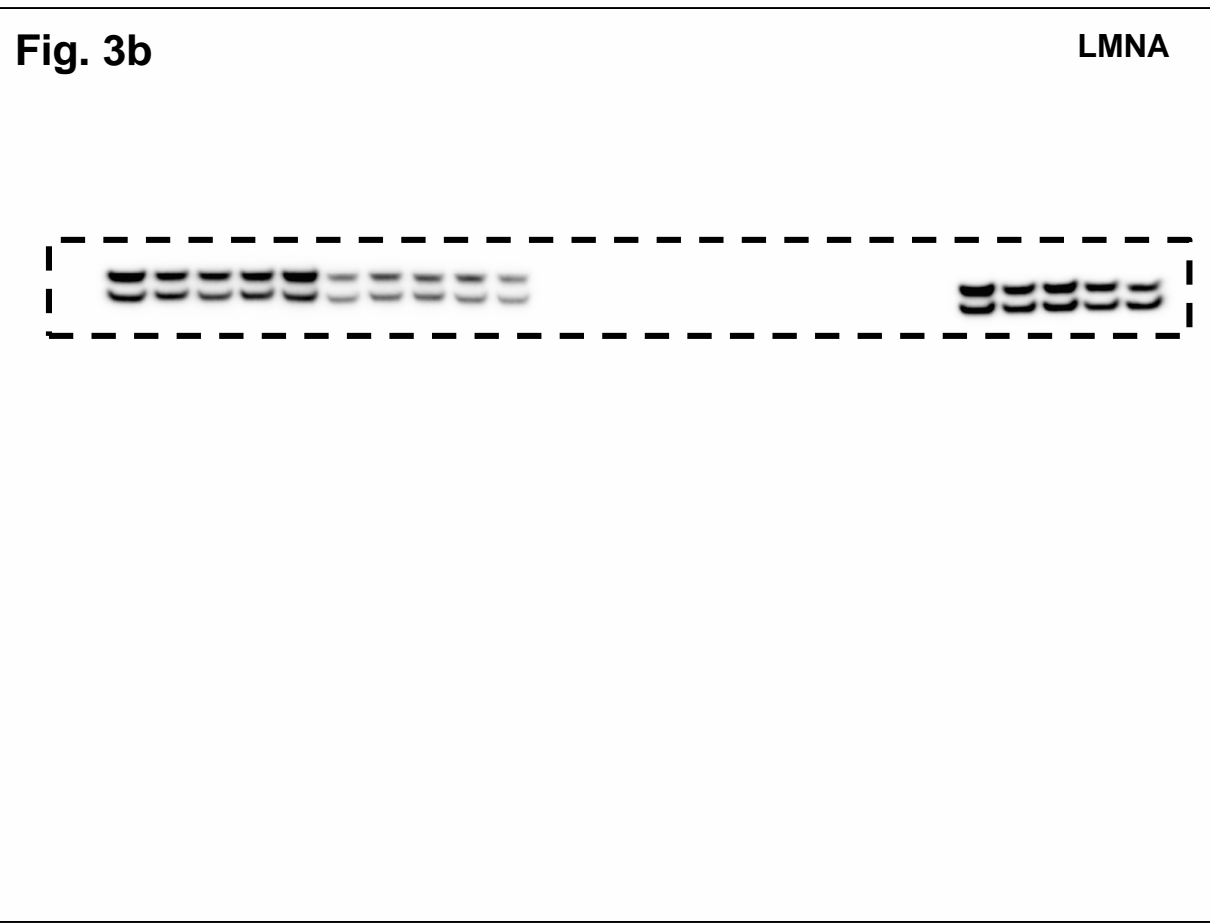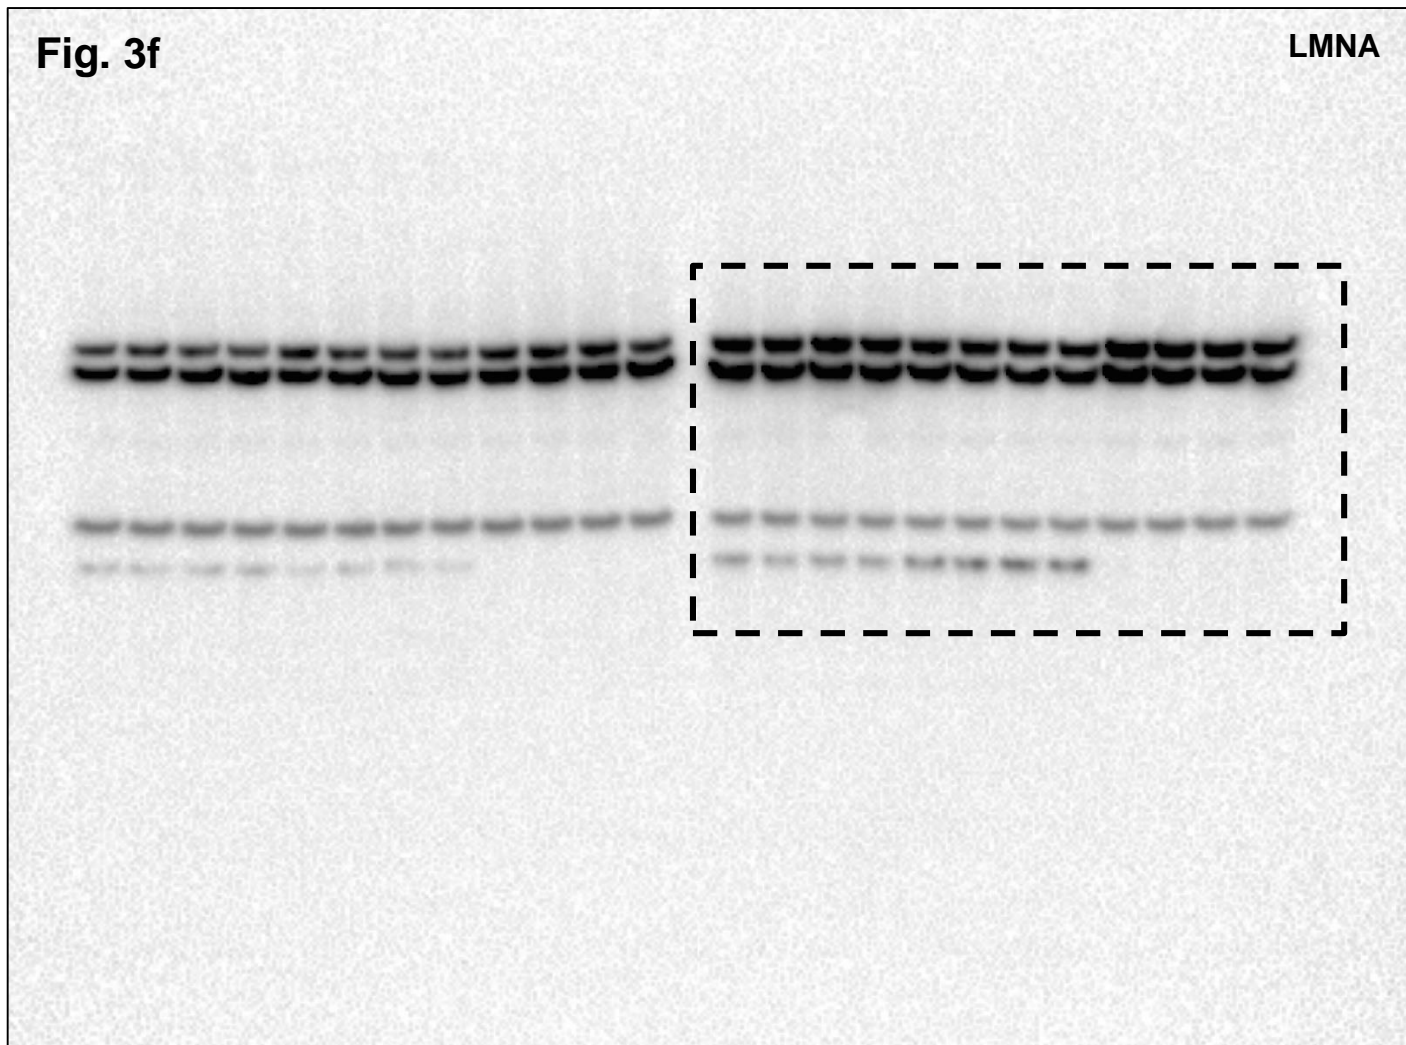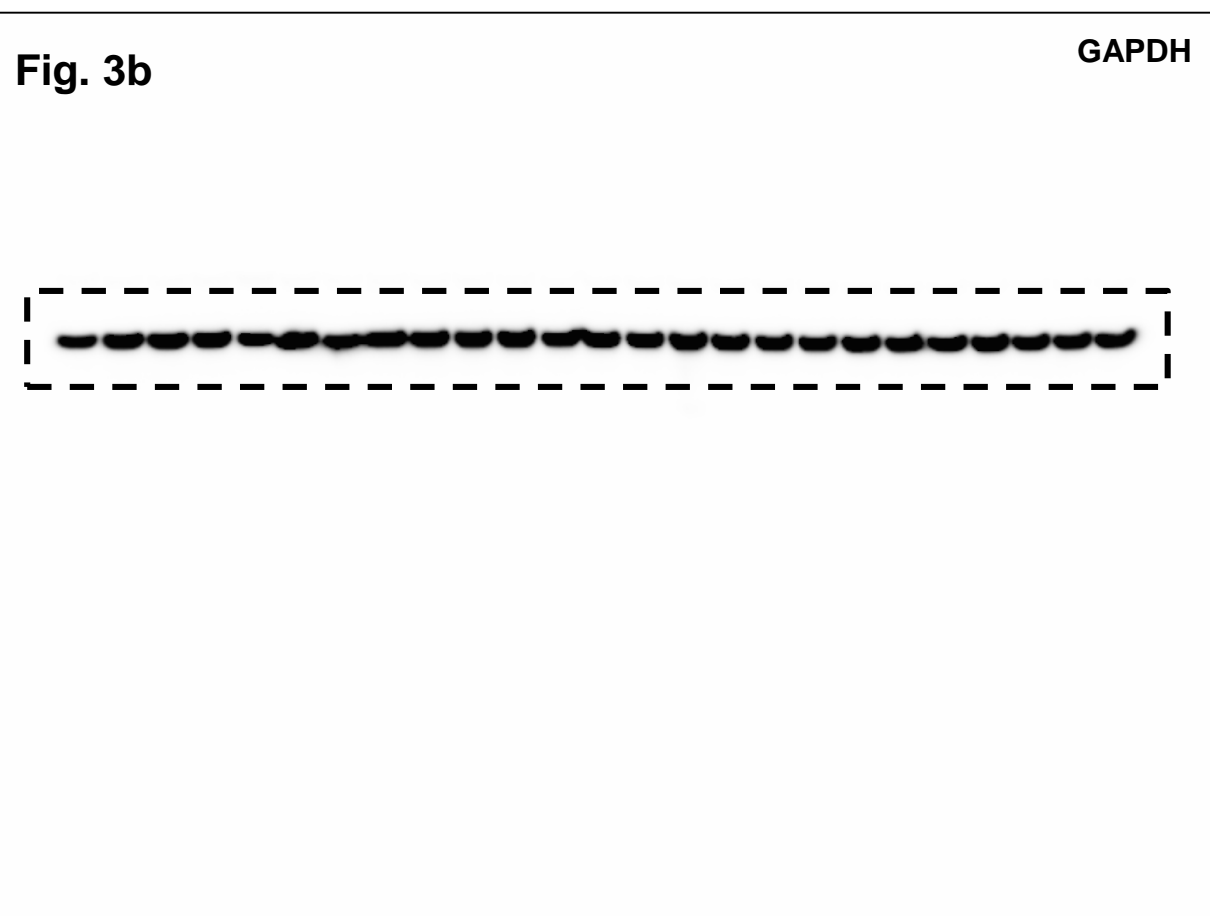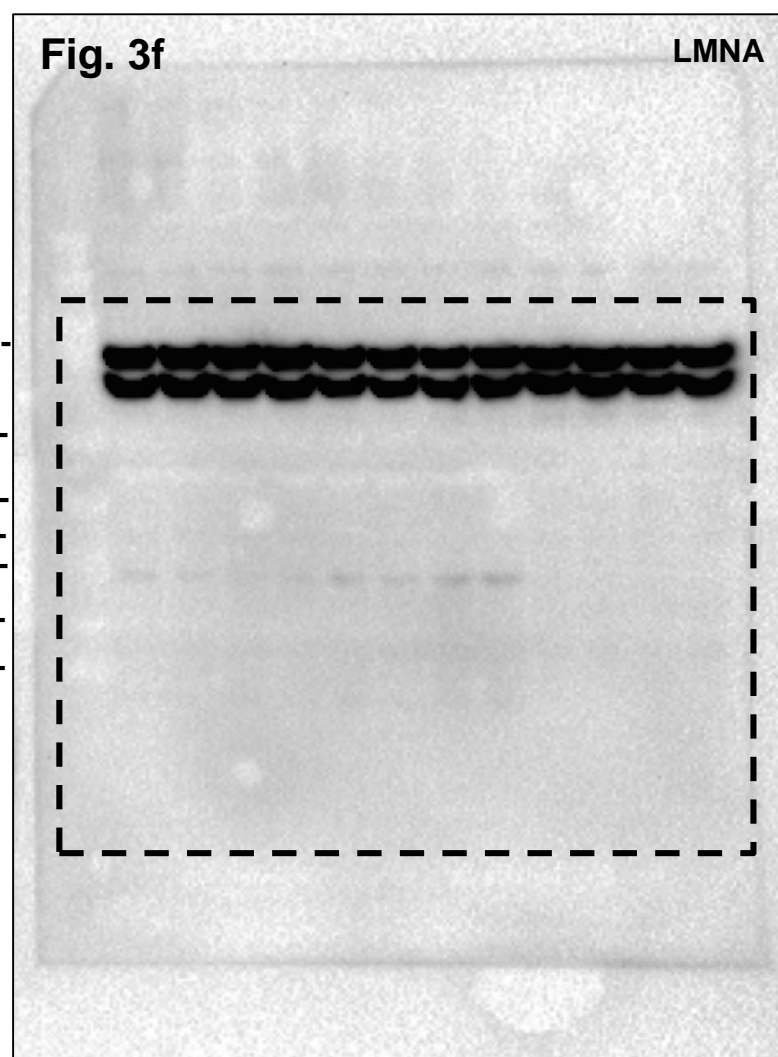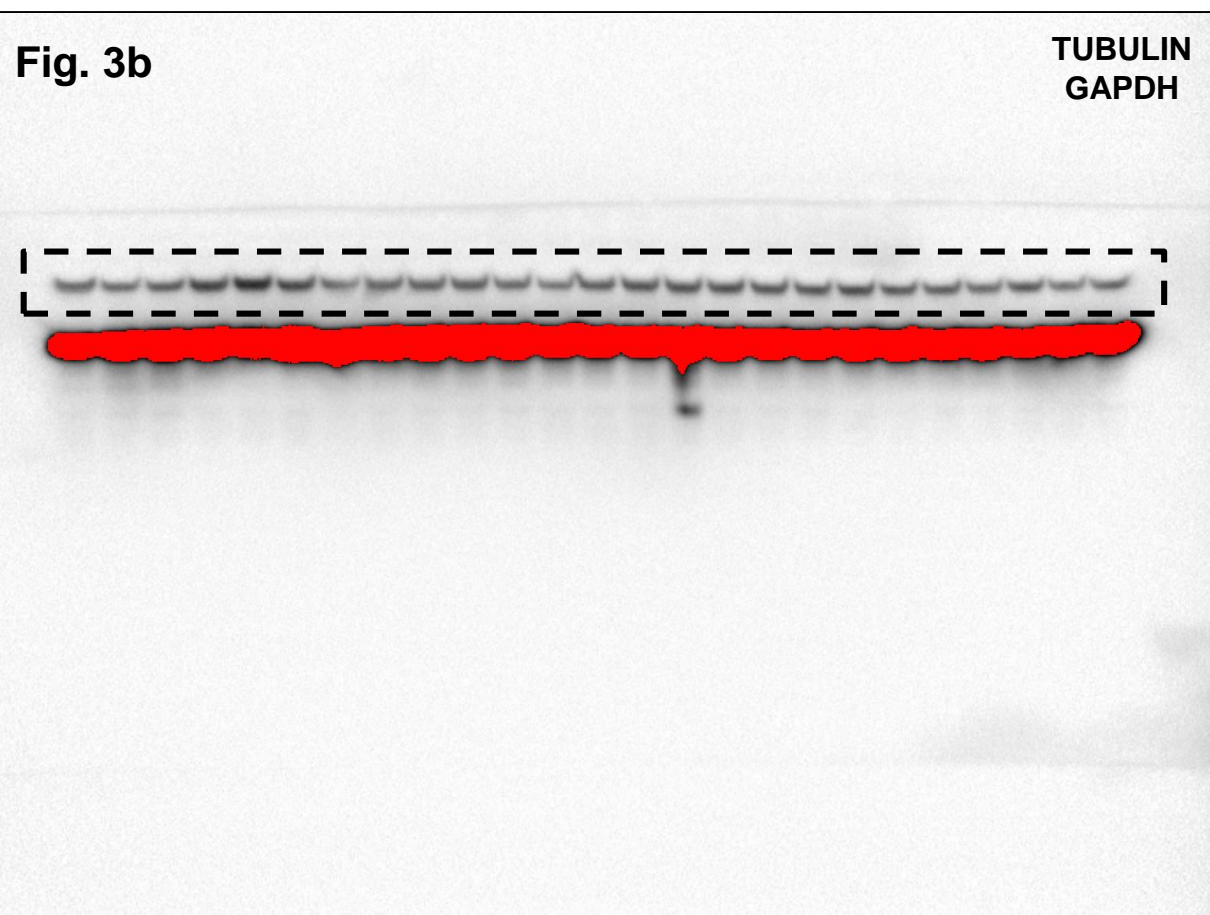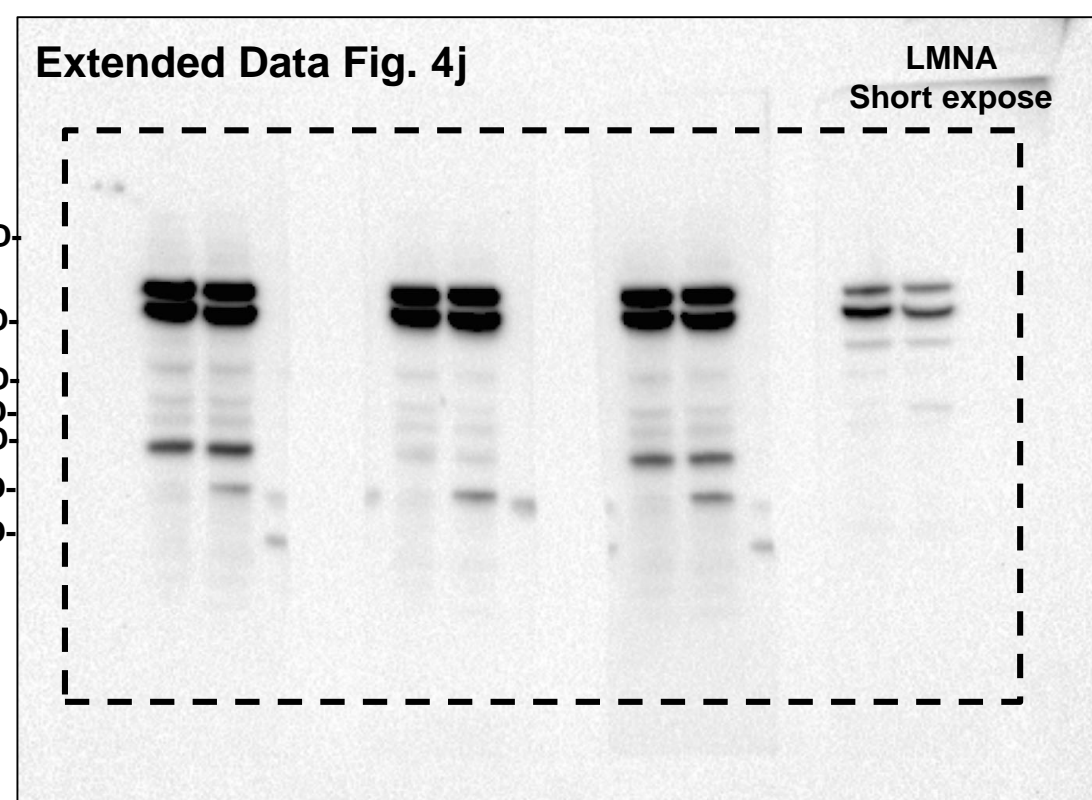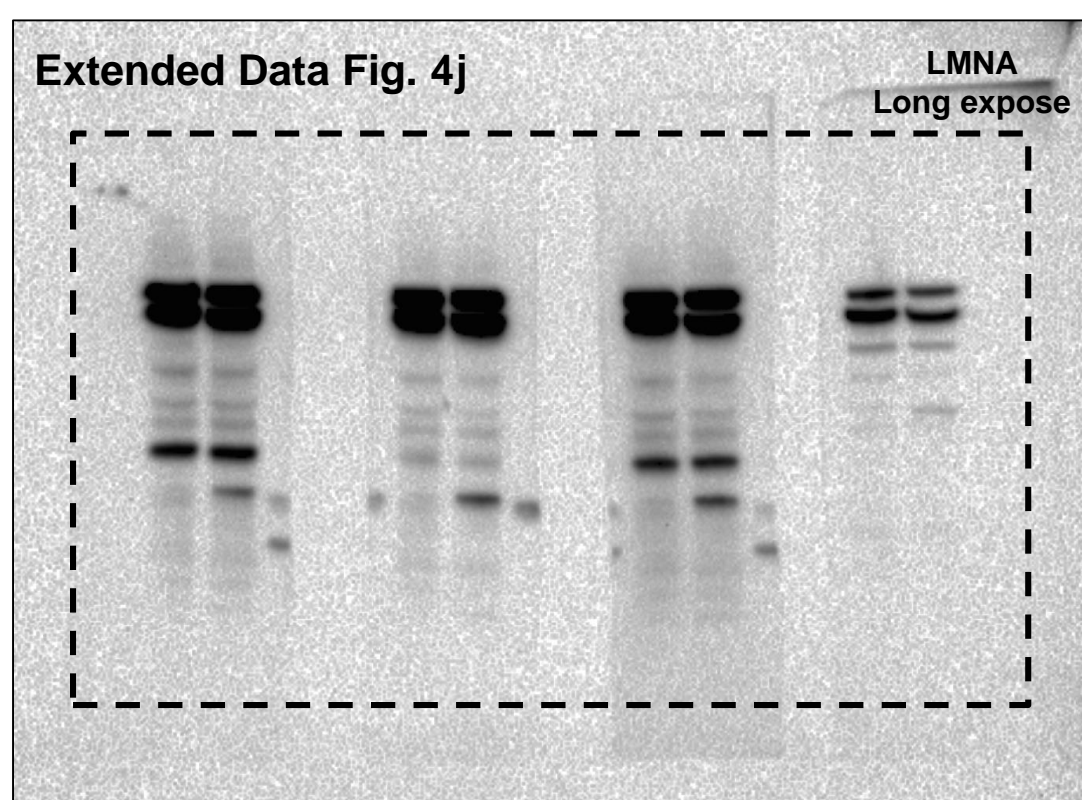

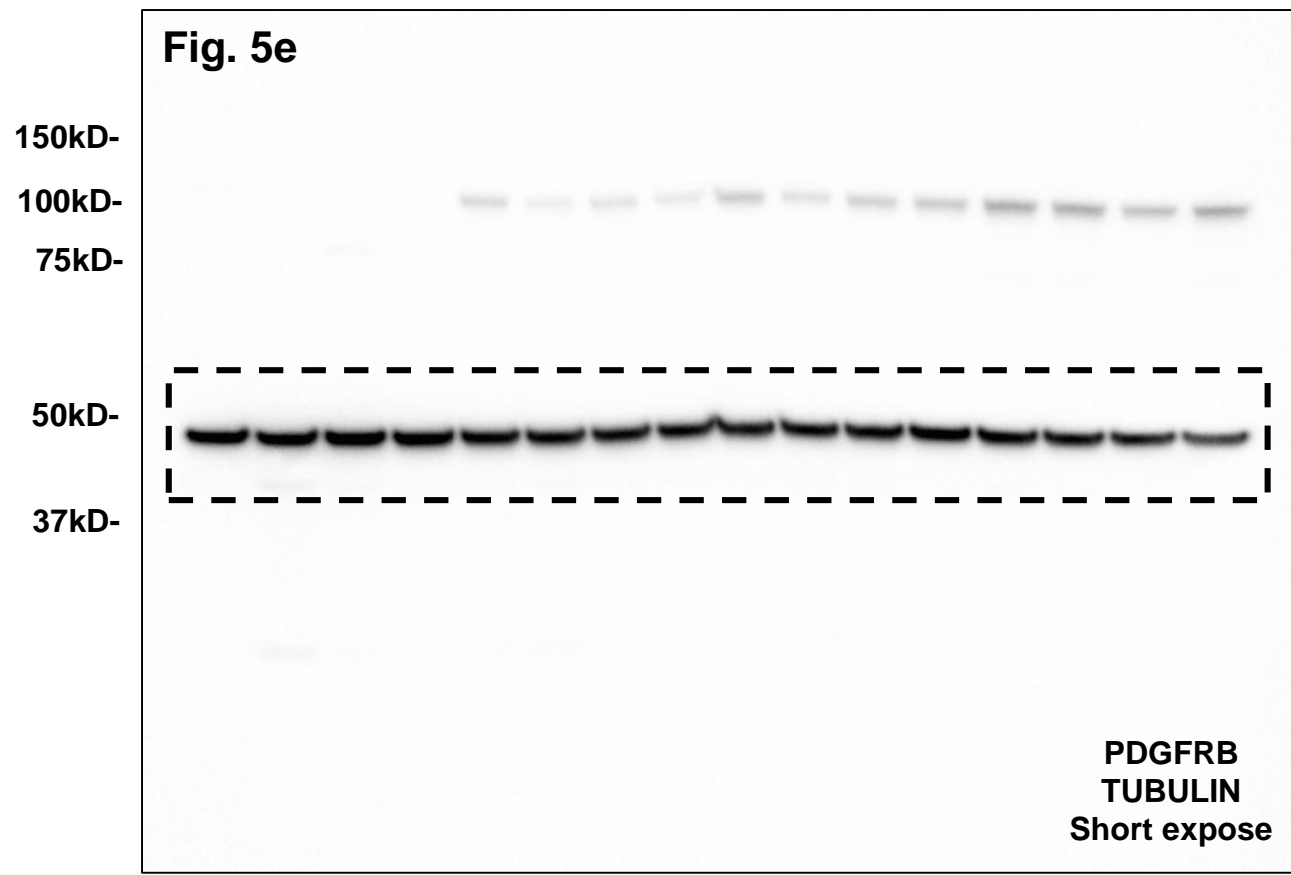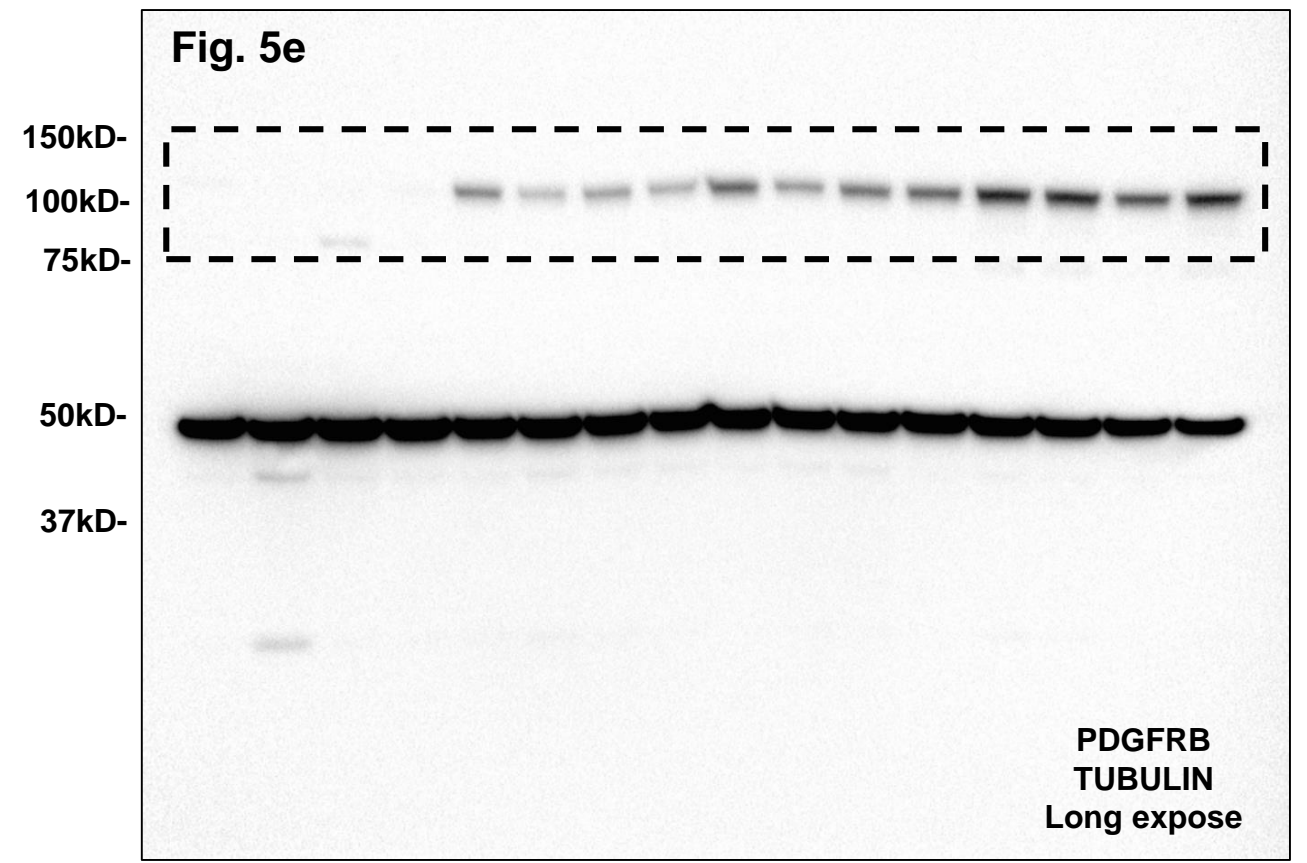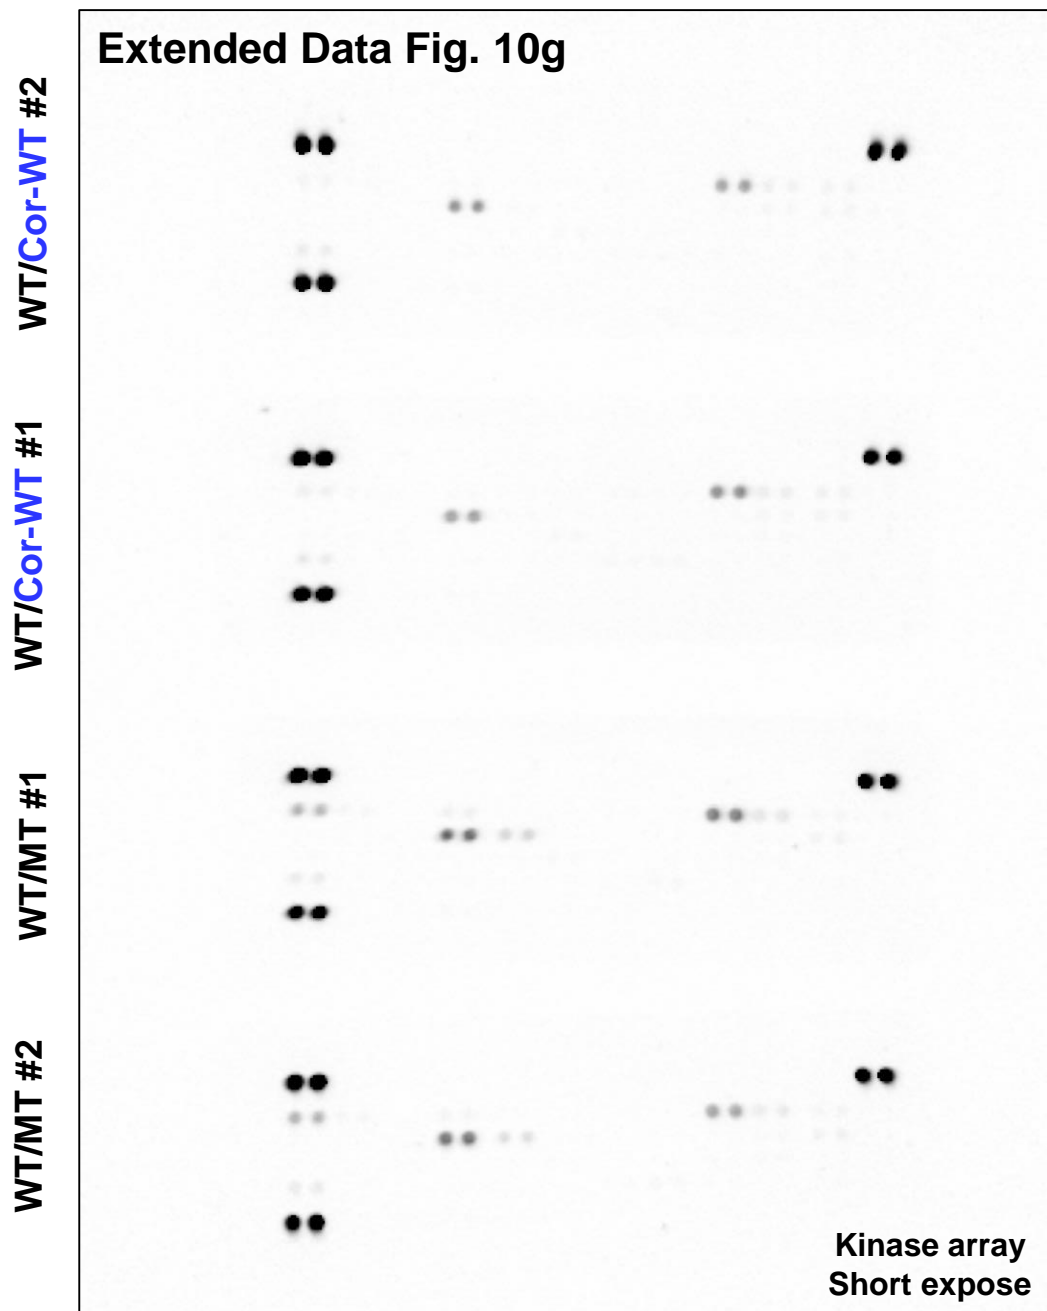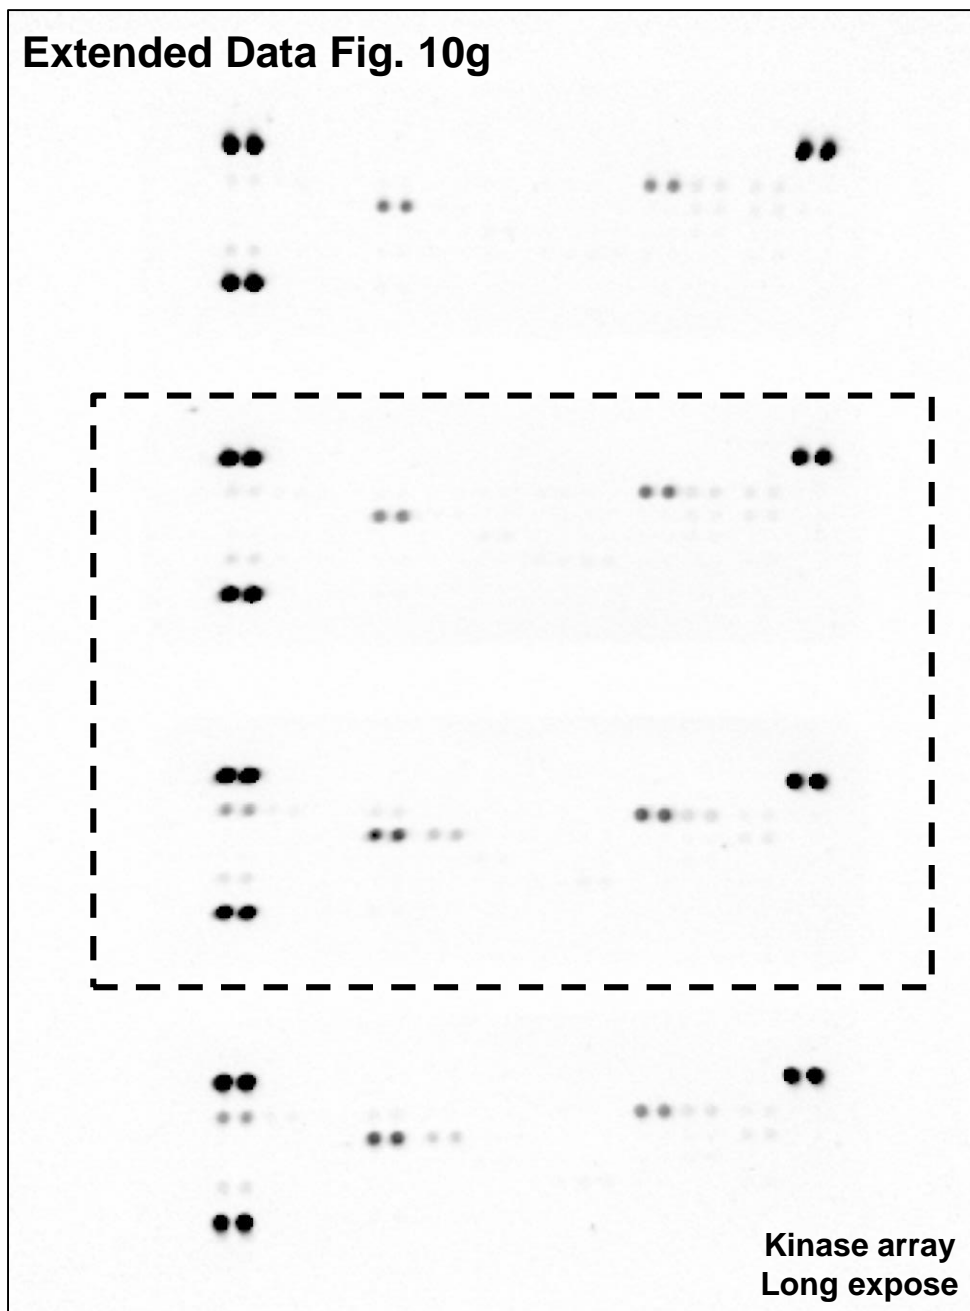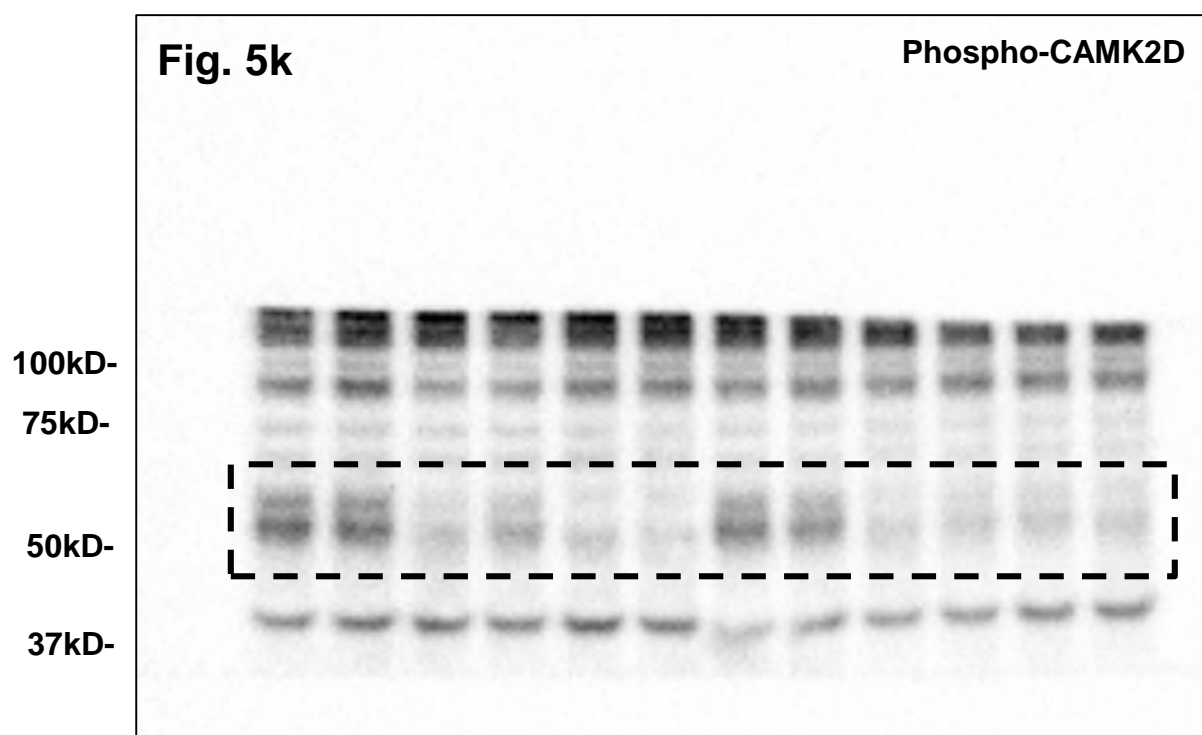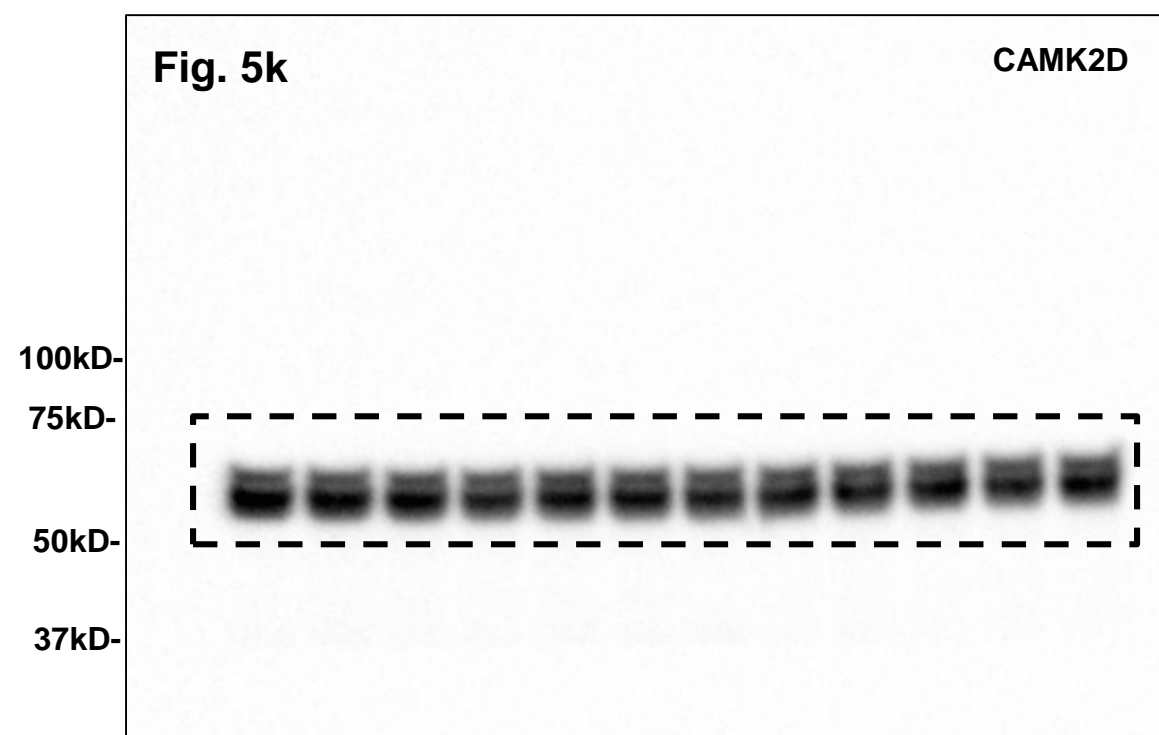

Supplement: NIHMS1532384-supplement-1.pdf [file NIHMS1532384-supplement-1.pdf]
